# Supplementary material for: Facile preparation of copper-based amorphous/crystalline heterophase nanocatalysts and their applications as efficient non-enzymatic biosensors
Source: Royal Society of Chemistry journal article supplement (doi:10.1039/d4ce00715h), 2024-01-01
Supplement: d4ce00715h1.pdf [file d4ce00715h1.pdf]

## Support Information

### **Facile preparation of copper based amorphous/crystalline heterophase nanocatalysts and their applications as efficient non-enzymatic biosensors**

Ruopeng Zhao,<sup>a,b</sup> Xiaonan Shi,<sup>a,b</sup> Jing Liu,<sup>a,b</sup> Peiyang Zhou,<sup>a,b</sup> Yandi Zhou,<sup>a,b</sup> Zhangyong Wu,<sup>a,b</sup> Lin Yao,<sup>a,b</sup> Yong Liu,<sup>\*a,b</sup> and Changrong Zhao<sup>\*c</sup>

<sup>a</sup>Laboratory of Novel Optoelectronic Technology for Ophthalmic **Devices** (NOTOD), School of Ophthalmology and Optometry, School of Biomedical Engineering, Wenzhou Medical University, Wenzhou, 325027, PR China.

<sup>b</sup>National Engineering Research Center of Ophthalmology and Optometry, Eye Hospital, Wenzhou Medical University, Wenzhou, 325027, China.

<sup>c</sup>School of Laboratory Medicine and Life Sciences, Wenzhou Medical University, Wenzhou, 325027, PR China.

Corresponding emails: [yongliu@wmu.edu.cn](mailto:yongliu@wmu.edu.cn) and [crzhao8017@163.com](mailto:crzhao8017@163.com)

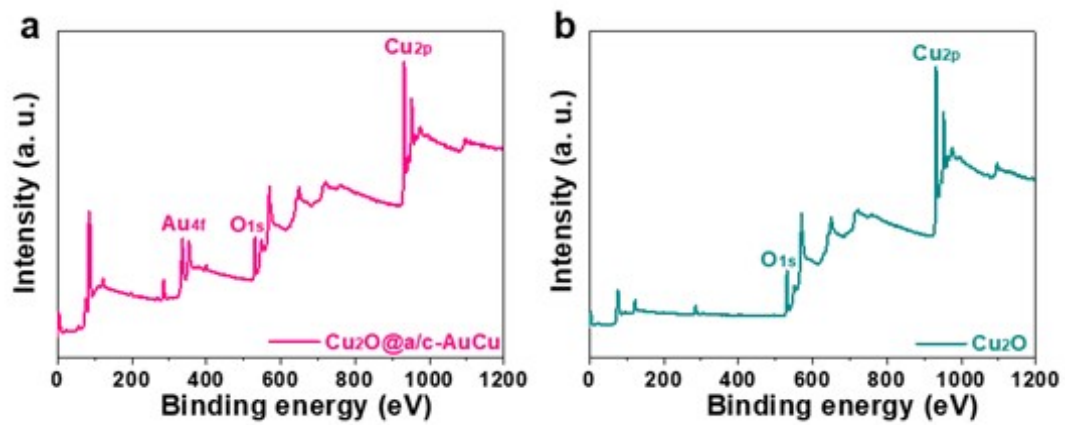

**Figure S1.** The XPS spectrum of (a)  $\text{Cu}_2\text{O}@a/c\text{-AuCu}$ , and (b)  $\text{Cu}_2\text{O}$ .

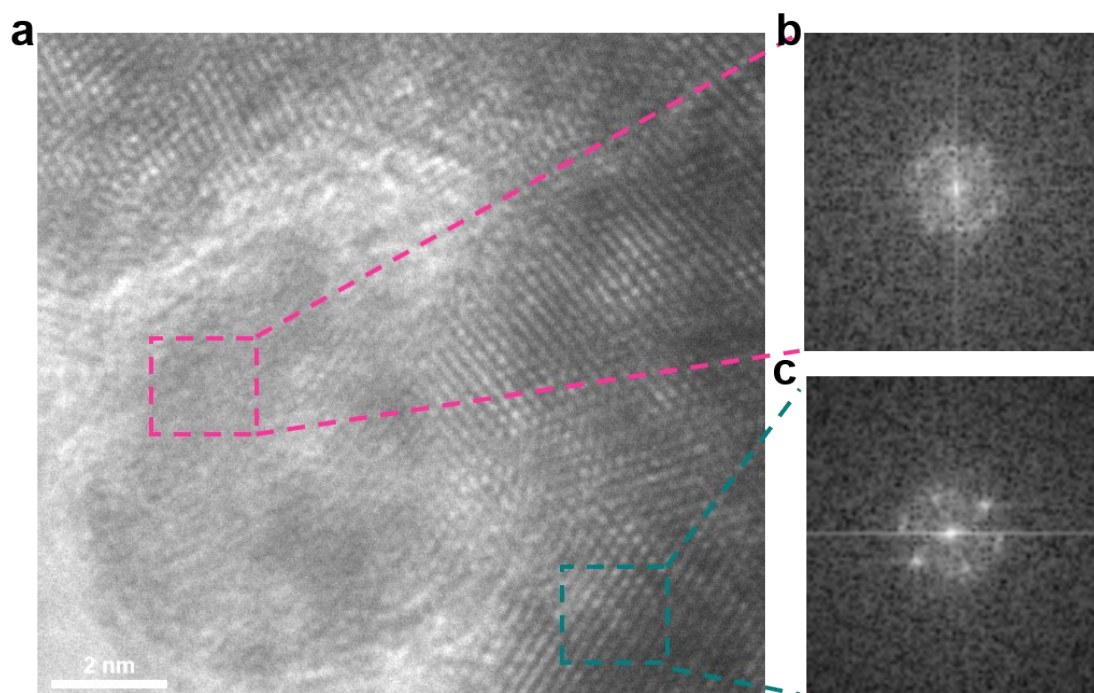

**Figure S2.** (a) High-resolution TEM image of the  $\text{Cu}_2\text{O}@a/c\text{-AuCu}$  alloy; (b) & (c) the corresponding fast Fourier transform (FFT) patterns from the different selected regions of (a).

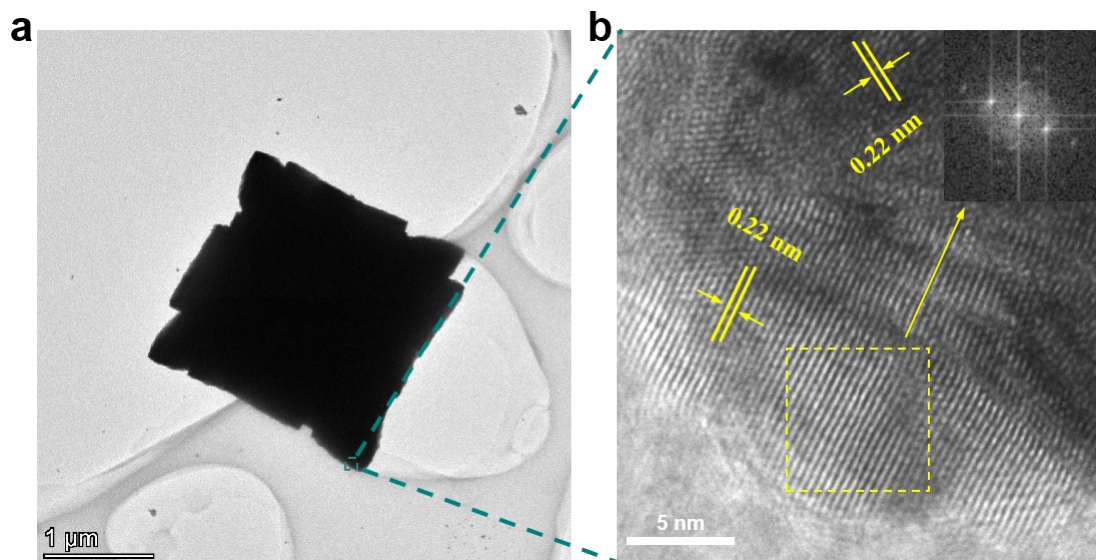

**Figure S3.** (a) TEM image and (b) High-resolution TEM image of the  $\text{Cu}_2\text{O}@c\text{-AuCu}$  alloy. Insert of (b): the corresponding fast Fourier transform (FFT) patterns of the selected yellow region.

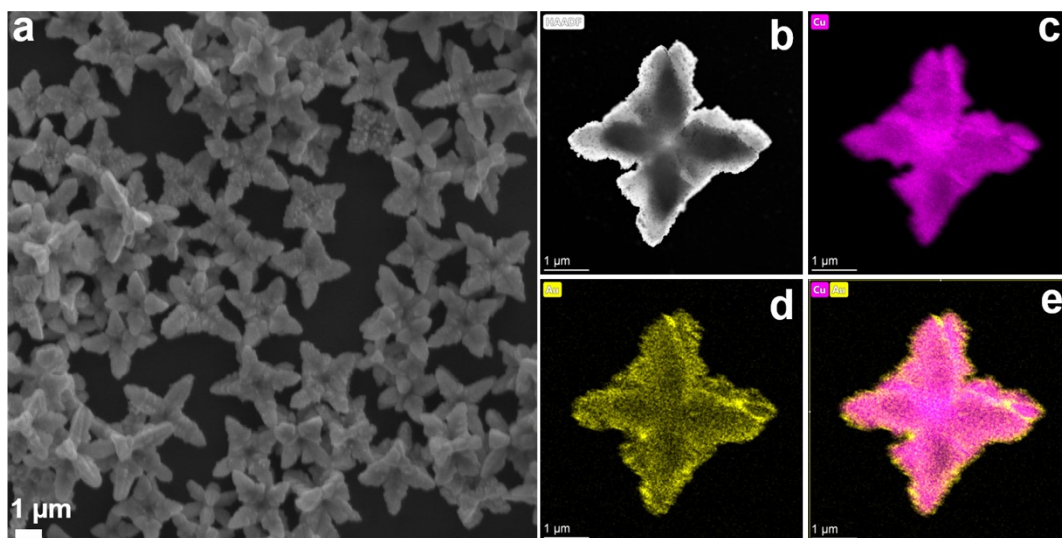

**Figure S4.** (a) SEM image and (b-e) element mapping images of the  $\text{Cu}_2\text{O}@c\text{-AuCu}$  alloy.

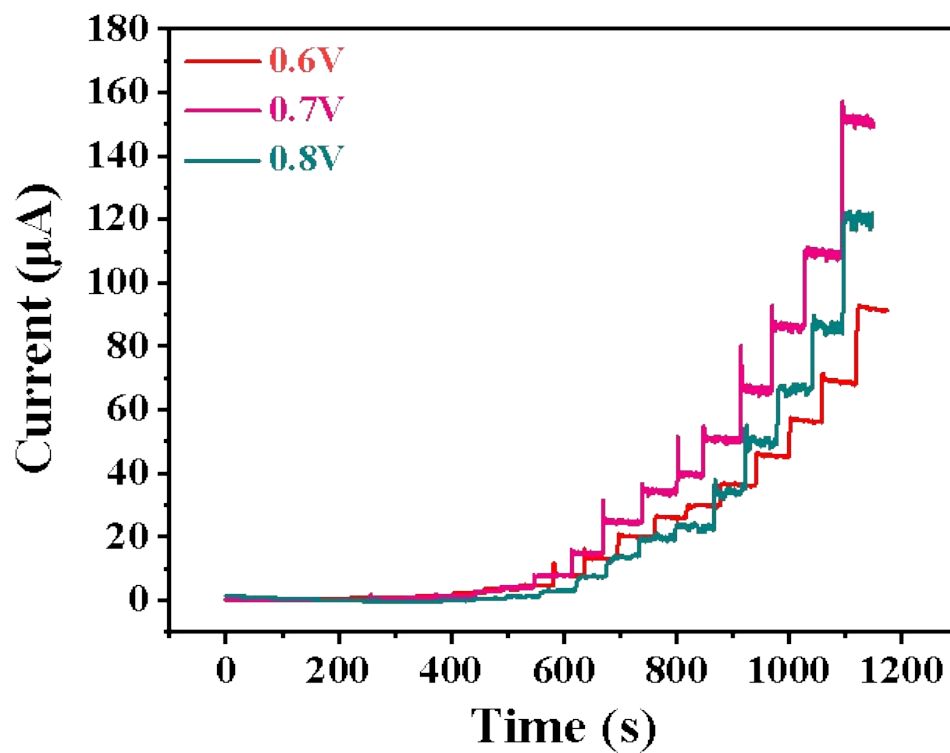

**Figure S5.** The chronoamperometry measurements polarized at different potentials after the continuous addition of glucose into 0.1 M NaOH solution.

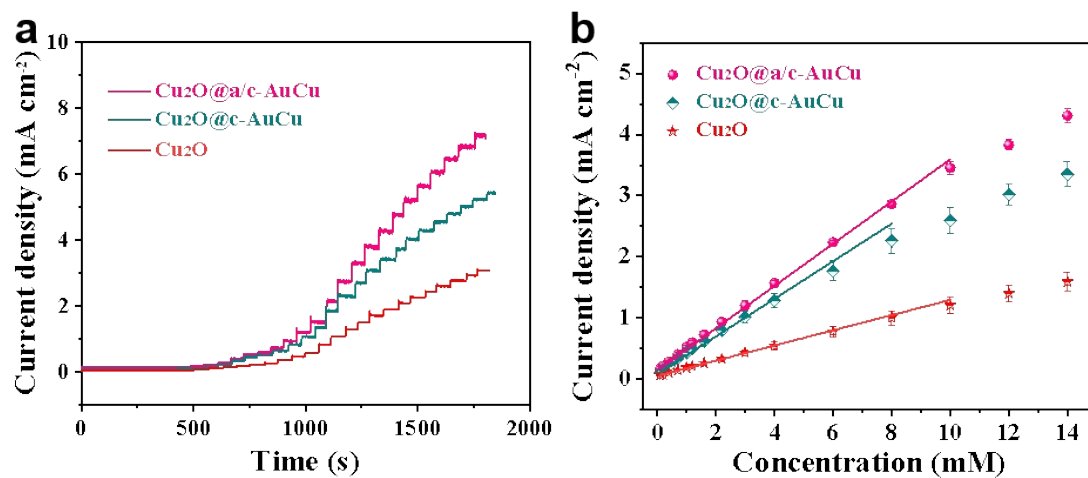

**Figure S6.** (a) The sensing performance of different sensors after the continuous addition of glucose at 0.7 V; (b) the corresponding calibration curves.

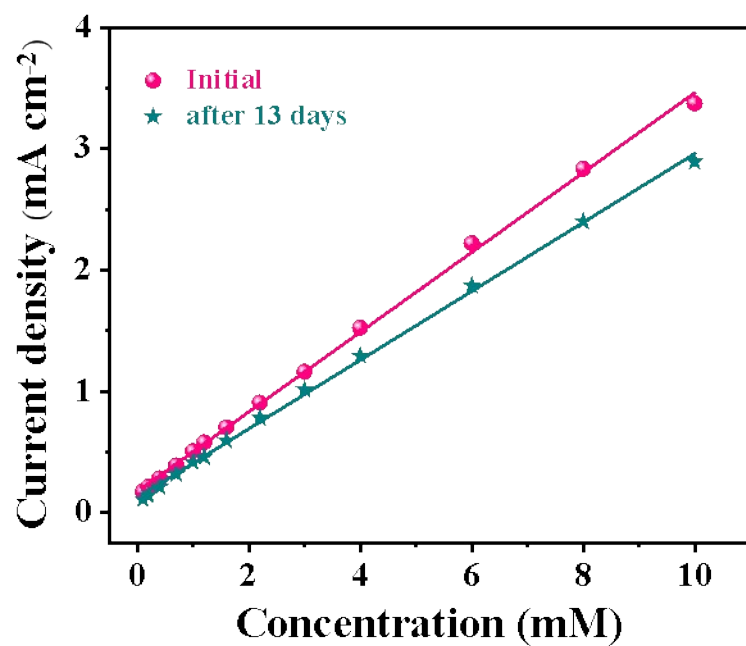

**Figure S7.** The corresponding calibration curves obtained from the long-term sensing stability test.



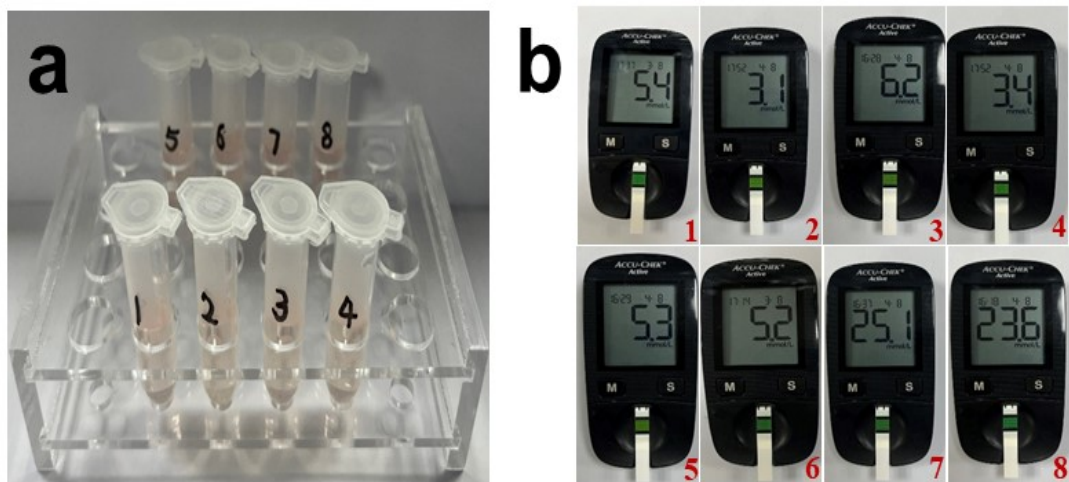

**Figure S8.** (a) Digital photos of the **rat** serum samples; and (b) the glucose testing results using the commercial **glucometer**.

**Table S1.** The glucose detection performance of the Cu<sub>2</sub>O@a/c-AuCu sensor compared to the other reported non-enzymatic sensors.

| No. | Catalysts                           | Linear range (mM) | Sensitivity ( $\mu\text{A mM}^{-1} \text{cm}^{-2}$ ) | Detection Limit ( $\mu\text{M}$ ) | Ref              |
|-----|-------------------------------------|-------------------|------------------------------------------------------|-----------------------------------|------------------|
| 1   | Pt@Pd nanoparticles                 | 0.01-9.2          | 247.3                                                | 3                                 | 1                |
| 2   | PtCu Nanochains                     | 0.01-17           | 135                                                  | 2.5                               | 2                |
| 3   | Cu@Cu <sub>2</sub> O                | 0.001-17.12       | 194.88                                               | 0.6                               | 3                |
| 4   | Cu <sub>2</sub> O SLNs              | 0.01-2.97         | 0.933                                                | 0.035                             | 4                |
| 5   | CuO/g-C <sub>3</sub> N <sub>4</sub> | 0.0005-8.5        | 274                                                  | 0.15                              | 5                |
| 6   | Ag-CuO/rGO                          | 0.01-28           | 214.37                                               | 0.76                              | 6                |
| 7   | Cu <sub>2</sub> O nanocubes         | 0.3-3.3           | 285                                                  | 3.3                               | 7                |
| 8   | Cu <sub>2</sub> O@a/c-AuCu alloy    | 0.1-10            | 345                                                  | 1.35                              | <b>This work</b> |

**Table S2.** Detection and recovery of glucose in **rat** serums.

| Sample | Added ( $\mu\text{M}$ ) | Found ( $\mu\text{M}$ ) | Recovery | RSD (n=3) |
|--------|-------------------------|-------------------------|----------|-----------|
| 1      | 10.00                   | 11.40                   | 114.05%  | 3.30%     |
| 2      | 10.00                   | 11.20                   | 112.00%  | 1.81%     |
| 3      | 10.00                   | 9.20                    | 91.76%   | 8.34%     |

#### Reference

1. M. A. Zahed, S. C. Barman, P. S. Das, M. Sharifuzzaman, H. S. Yoon, S. H. Yoon and J. Y. Park, *Biosens. Bioelectron.*, 2020, **160**, 112220.
2. X. Cao, N. Wang, S. Jia and Y. Shao, *Anal. Chem.*, 2013, **85**, 5040-5046.
3. Y. Gao, F. Yang, Q. Yu, R. Fan, M. Yang, S. Rao, Q. Lan, Z. Yang and Z. Yang, *Microchim. Acta*, 2019, **186**, 1-9.
4. R. Khan, R. Ahmad, P. Rai, L.-W. Jang, J.-H. Yun, Y.-T. Yu, Y.-B. Hahn and I.-H. Lee, *Sensor Actuat B-Chem*, 2014, **203**, 471-476.
5. Y. Huang, Y. Tan, C. Feng, S. Wang, H. Wu and G. Zhang, *Microchim. Acta*, 2019, **186**, 1-9.
6. D. Xu, C. Zhu, X. Meng, Z. Chen, Y. Li, D. Zhang and S. Zhu, *Sensor Actuat B-Chem*, 2018, **265**, 435-442.
7. M. Liu, R. Liu and W. Chen, *Biosens. Bioelectron.*, 2013, **45**, 206.
